# Supplementary material for: Analytical Sensitivity of Six SARS-CoV-2 Rapid Antigen Tests for Omicron versus Delta Variant
Source: MDPI journal article supplement (doi:10.3390/v14040654), 2022-03-22
Supplement: s1 [file s1]

**GISAID's ID of the strains included in the RAD comparison\* :**

|                  |
|------------------|
| EPI_ISL_10945573 |
| EPI_ISL_10942641 |
| EPI_ISL_10942640 |
| EPI_ISL_10942639 |
| EPI_ISL_10942645 |
| EPI_ISL_10942741 |
| EPI_ISL_10945571 |
| EPI_ISL_10942647 |
| EPI_ISL_10942651 |
| EPI_ISL_10942650 |
| EPI_ISL_10945572 |
| EPI_ISL_10942644 |
| EPI_ISL_10942675 |
| EPI_ISL_10942717 |
| EPI_ISL_10942673 |
| EPI_ISL_10942716 |
| EPI_ISL_10942652 |
| EPI_ISL_10942670 |
| EPI_ISL_10942642 |
| EPI_ISL_10942668 |
| EPI_ISL_10942711 |
| EPI_ISL_10942731 |
| EPI_ISL_10942713 |
| EPI_ISL_10942689 |
| EPI_ISL_10942666 |
| EPI_ISL_10942708 |
| EPI_ISL_10942677 |
| EPI_ISL_10942728 |
| EPI_ISL_10942665 |
| EPI_ISL_10945569 |
| EPI_ISL_10942740 |
| EPI_ISL_10942686 |
| EPI_ISL_10942705 |
| EPI_ISL_10942648 |
| EPI_ISL_10942704 |
| EPI_ISL_10942643 |
| EPI_ISL_10942684 |
| EPI_ISL_10942746 |
| EPI_ISL_10942744 |
| EPI_ISL_10942703 |

|                  |
|------------------|
| EPI_ISL_10942743 |
| EPI_ISL_10942702 |
| EPI_ISL_10942701 |
| EPI_ISL_10942682 |
| EPI_ISL_10942680 |
| EPI_ISL_10942742 |
| EPI_ISL_10942700 |
| EPI_ISL_10942678 |
| EPI_ISL_10942699 |
| EPI_ISL_10942738 |
| EPI_ISL_10942698 |
| EPI_ISL_10942739 |
| EPI_ISL_10942646 |
| EPI_ISL_10942697 |
| EPI_ISL_10942696 |
| EPI_ISL_10942695 |
| EPI_ISL_10942737 |
| EPI_ISL_10942694 |
| EPI_ISL_10942736 |
| EPI_ISL_10942693 |
| EPI_ISL_10942692 |
| EPI_ISL_10942735 |
| EPI_ISL_10942691 |
| EPI_ISL_10942734 |
| EPI_ISL_10942649 |
| EPI_ISL_10942733 |
| EPI_ISL_10945570 |
| EPI_ISL_10942732 |
| EPI_ISL_10942745 |
| EPI_ISL_10942729 |
| EPI_ISL_10942730 |
| EPI_ISL_10942688 |
| EPI_ISL_10942727 |
| EPI_ISL_10942657 |
| EPI_ISL_10942687 |
| EPI_ISL_10942726 |
| EPI_ISL_10942685 |
| EPI_ISL_10942683 |
| EPI_ISL_10942681 |
| EPI_ISL_10942725 |
| EPI_ISL_10942724 |
| EPI_ISL_10942723 |
| EPI_ISL_10942722 |

|                  |
|------------------|
| EPI_ISL_10942679 |
| EPI_ISL_10942721 |
| EPI_ISL_10942672 |
| EPI_ISL_10942720 |
| EPI_ISL_10942676 |
| EPI_ISL_10942719 |
| EPI_ISL_10942674 |
| EPI_ISL_10942667 |
| EPI_ISL_10942669 |
| EPI_ISL_10942671 |
| EPI_ISL_10942690 |
| EPI_ISL_10942663 |
| EPI_ISL_10942718 |
| EPI_ISL_10942661 |
| EPI_ISL_10942715 |
| EPI_ISL_10942664 |
| EPI_ISL_10942662 |
| EPI_ISL_10942660 |
| EPI_ISL_10942714 |
| EPI_ISL_10942712 |
| EPI_ISL_10942656 |
| EPI_ISL_10942658 |
| EPI_ISL_10942710 |
| EPI_ISL_10942655 |
| EPI_ISL_10942654 |
| EPI_ISL_10942709 |
| EPI_ISL_10942653 |
| EPI_ISL_10942707 |
| EPI_ISL_10942706 |
| EPI_ISL_10942659 |

\*2 samples had too low quality to be accepted.
